# Supplementary material
Source: Elsevier journal article supplement (https://rcastoragev2.blob.core.windows.net/1b582ba90db813f9b4c8d9754907d62d/mmc1.pdf)
Supplement: mmc1 [file mmc1.pdf]

**Supplemental information**

**Axonal plasticity in response to active forces  
generated through magnetic nano-pulling**

**Alessandro Falconieri, Sara De Vincentiis, Valentina Cappello, Domenica Convertino, Ravi Das, Samuele Ghignoli, Sofia Figoli, Stefano Luin, Frederic Català-Castro, Laura Marchetti, Ugo Borello, Michael Krieg, and Vittoria Raffa**

## Supplemental information

### Axonal plasticity in response to active forces generated through magnetic nano-pulling

Alessandro Falconieri, Sara De Vincentiis, Valentina Cappello, Domenica Convertino, Ravi Das, Samuele Ghignoli, Sofia Figoli, Stefano Luin, Frederic Català-Castro, Laura Marchetti, Ugo Borello, Michael Krieg, Vittoria Raffa

**Table S1. qPCR analysis (related to Figure 1)**

| Group      | Replicate | Cycle, $\beta$ -actin mRNA | Cycle, H1 mRNA |
|------------|-----------|----------------------------|----------------|
| Control, A | 1         | 34.38                      | -              |
|            | 2         | 38.22                      | -              |
|            | 3         | 36.77                      | -              |
| Stretch, A | 1         | 34.87                      | -              |
|            | 2         | 38.87                      | -              |
|            | 3         | 38.16                      | -              |
| Control, S | 1         | 19.97                      | 24.92          |
|            | 2         | 19.61                      | 24.40          |
|            | 3         | 19.80                      | 25.33          |
| Stretch, S | 1         | 19.18                      | 24.54          |
|            | 2         | 17.63                      | 23.46          |
|            | 3         | 19.68                      | 25.230         |

**Table S2. GO of cellular Component (CC) (related to Figure 1)**

| GOTERM_cc_direct | Term                          | Gene count | <i>P</i> value |
|------------------|-------------------------------|------------|----------------|
| GO:0005737       | cytoplasm                     | 313        | 3.00E-05       |
| GO:0005765       | lysosomal membrane            | 24         | 4.90E-05       |
| GO:0005794       | Golgi apparatus               | 74         | 8.80E-05       |
| GO:0005768       | endosome                      | 39         | 4.20E-04       |
| GO:0031902       | late endosome membrane        | 12         | 6.30E-04       |
| GO:0005764       | lysosome                      | 26         | 1.40E-03       |
| GO:0016020       | membrane                      | 314        | 1.60E-03       |
| GO:0005739       | mitochondrion                 | 91         | 2.70E-03       |
| GO:0005856       | cytoskeleton                  | 61         | 7.40E-03       |
| GO:0005815       | microtubule organizing center | 14         | 7.90E-03       |

|            |                                |    |          |
|------------|--------------------------------|----|----------|
| GO:0031225 | anchored component of membrane | 13 | 9.40E-03 |
| GO:0005622 | intracellular                  | 81 | 1.30E-02 |
| GO:0005783 | endoplasmic reticulum          | 67 | 2.40E-02 |
| GO:0005770 | late endosome                  | 11 | 3.30E-02 |
| GO:0045202 | synapse                        | 28 | 6.40E-02 |
| GO:0005829 | cytosol                        | 83 | 7.40E-02 |

**Table S3. Annotated genes dysregulated in GO:0005856 (cytoskeleton) (related to Figure 1)**

| <b>Symbol</b> | <b>Name</b>                                                                | <b>Up/Down</b> | <b>Assigned category</b>  |
|---------------|----------------------------------------------------------------------------|----------------|---------------------------|
| Flnb          | filamin, beta                                                              | up             | Actin-binding             |
| Mical1        | microtubule associated monooxygenase, calponin and LIM domain containing 1 | up             | Actin cytoskeleton        |
| Pdlim1        | PDZ and LIM domain 1 (elfin)                                               | up             | Actin-binding             |
| Svil          | supervillin                                                                | up             | Actin-binding             |
| Tln2          | talin 2                                                                    | up             | Actin-binding             |
| Tmod1         | tropomodulin 1                                                             | up             | Actin cytoskeleton        |
| Tpm2          | tropomyosin 2, beta                                                        | up             | Actin cytoskeleton        |
| Tagln         | transgelin                                                                 | up             | Actin cytoskeleton        |
| Ahnak         | AHNAK nucleoprotein (desmoyokin)                                           | up             | Actin cytoskeleton        |
| Axl           | AXL receptor tyrosine kinase                                               | up             | Actin-binding             |
| Dgkh          | diacylglycerol kinase, eta                                                 | up             | Actin-binding             |
| Trip6         | thyroid hormone receptor interactor 6                                      | up             | Actin-binding             |
| Cdc42ep1      | CDC42 effector protein (Rho GTPase binding) 1                              | up             | Actin cytoskeleton        |
| Rgcc          | regulator of cell cycle                                                    | up             | MT cytoskeleton           |
| Sh3pxd2b      | SH3 and PX domains 2B                                                      | up             | Actin cytoskeleton        |
| Dynlrb2       | dynein light chain roadblock-type 2                                        | up             | Motor protein / transport |
| Rab29         | RAB29, member RAS oncogene family                                          | up             | Motor protein / transport |
| Zmynd10       | zinc finger, MYND domain containing 10                                     | up             | Motor protein / transport |
| Kif18b        | kinesin family member 18B                                                  | up             | Motor protein / transport |

|                   |                                                     |      |                           |
|-------------------|-----------------------------------------------------|------|---------------------------|
| 1110017D15<br>Rik | RIKEN cDNA 1110017D15 gene                          | up   | MT-binding                |
| Trim36            | tripartite motif-containing 36                      | up   | MT-binding                |
| Rad51d            | RAD51 paralog D                                     | up   | MT-binding                |
| Ttll9             | tubulin tyrosine ligase-like family, member 9       | up   | MT-binding                |
| Ccsap             | centriole, cilia and spindle associated protein     | up   | MT-binding                |
| Cenpe             | centromere protein E                                | up   | MT-binding                |
| Fam83d            | family with sequence similarity 83, member D        | up   | MT-binding                |
| Mtus1             | mitochondrial tumor suppressor 1                    | up   | MT-binding                |
| Reep4             | receptor accessory protein 4                        | up   | MT-binding                |
| Gramd3            | GRAM domain containing 3                            | up   | MT cytoskeleton           |
| Frmd5             | FERM domain containing 5                            | up   | MT cytoskeleton           |
| Anapc7            | anaphase promoting complex subunit 7                | up   | MT-binding                |
| Arl6              | ADP-ribosylation factor-like 6                      | up   | MT-binding                |
| Aurkb             | aurora kinase B                                     | up   | MT cytoskeleton           |
| Cenpv             | centromere protein V                                | up   | MT-binding                |
| Esrra             | estrogen related receptor, alpha                    | up   | MT-binding                |
| Hmmr              | hyaluronan mediated motility receptor (RHAMM)       | up   | MT-binding                |
| Prkci             | protein kinase C, iota                              | up   | MT cytoskeleton           |
| Abca2             | ATP-binding cassette, sub-family A (ABC1), member 2 | up   | MT-binding                |
| Pcnt              | pericentrin (kendrin)                               | up   | MT-binding                |
| Tubgcp5           | tubulin, gamma complex associated protein 5         | up   | MT cytoskeleton           |
| Bcas3             | BCAS3 microtubule associated cell migration factor  | up   | MT cytoskeleton           |
| Klhl21            | kelch-like 21                                       | up   | MT cytoskeleton           |
| Tada2a            | transcriptional adaptor 2A                          | up   | MT cytoskeleton           |
| Hap1              | huntingtin-associated protein 1                     | up   | Motor protein / transport |
| Arc               | activity regulated cytoskeletal-associated protein  | down | Actin cytoskeleton        |
| Ccdc66            | coiled-coil domain containing 66                    | down | MT-binding                |

|         |                                                                            |      |                    |
|---------|----------------------------------------------------------------------------|------|--------------------|
| Dapk1   | death associated protein kinase 1                                          | down | Actin cytoskeleton |
| Fntb    | farnesyltransferase, CAAX box, beta                                        | down | MT cytoskeleton    |
| Gdpd2   | glycerophosphodiester phosphodiesterase domain containing 2                | down | Actin cytoskeleton |
| Katnal1 | katanin p60 subunit A-like 1                                               | down | MT cytoskeleton    |
| Klhl3   | kelch-like 3                                                               | down | Actin-binding      |
| Mark4   | MAP/microtubule affinity regulating kinase 4                               | down | MT cytoskeleton    |
| Mical3  | microtubule associated monooxygenase, calponin and LIM domain containing 3 | down | Actin cytoskeleton |
| Rhobtb3 | Rho-related BTB domain containing 3                                        | down | Actin cytoskeleton |
| Shtn1   | shootin 1                                                                  | down | MT cytoskeleton    |
| Spire2  | spire type actin nucleation factor 2                                       | down | Actin cytoskeleton |
| Topbp1  | topoisomerase (DNA) II binding protein 1                                   | down | Actin cytoskeleton |
| Tppp    | tubulin polymerization promoting protein                                   | down | MT cytoskeleton    |
| Tsc1    | TSC complex subunit 1                                                      | down | Actin cytoskeleton |
| Ttll4   | tubulin tyrosine ligase-like family, member 4                              | down | MT-binding         |

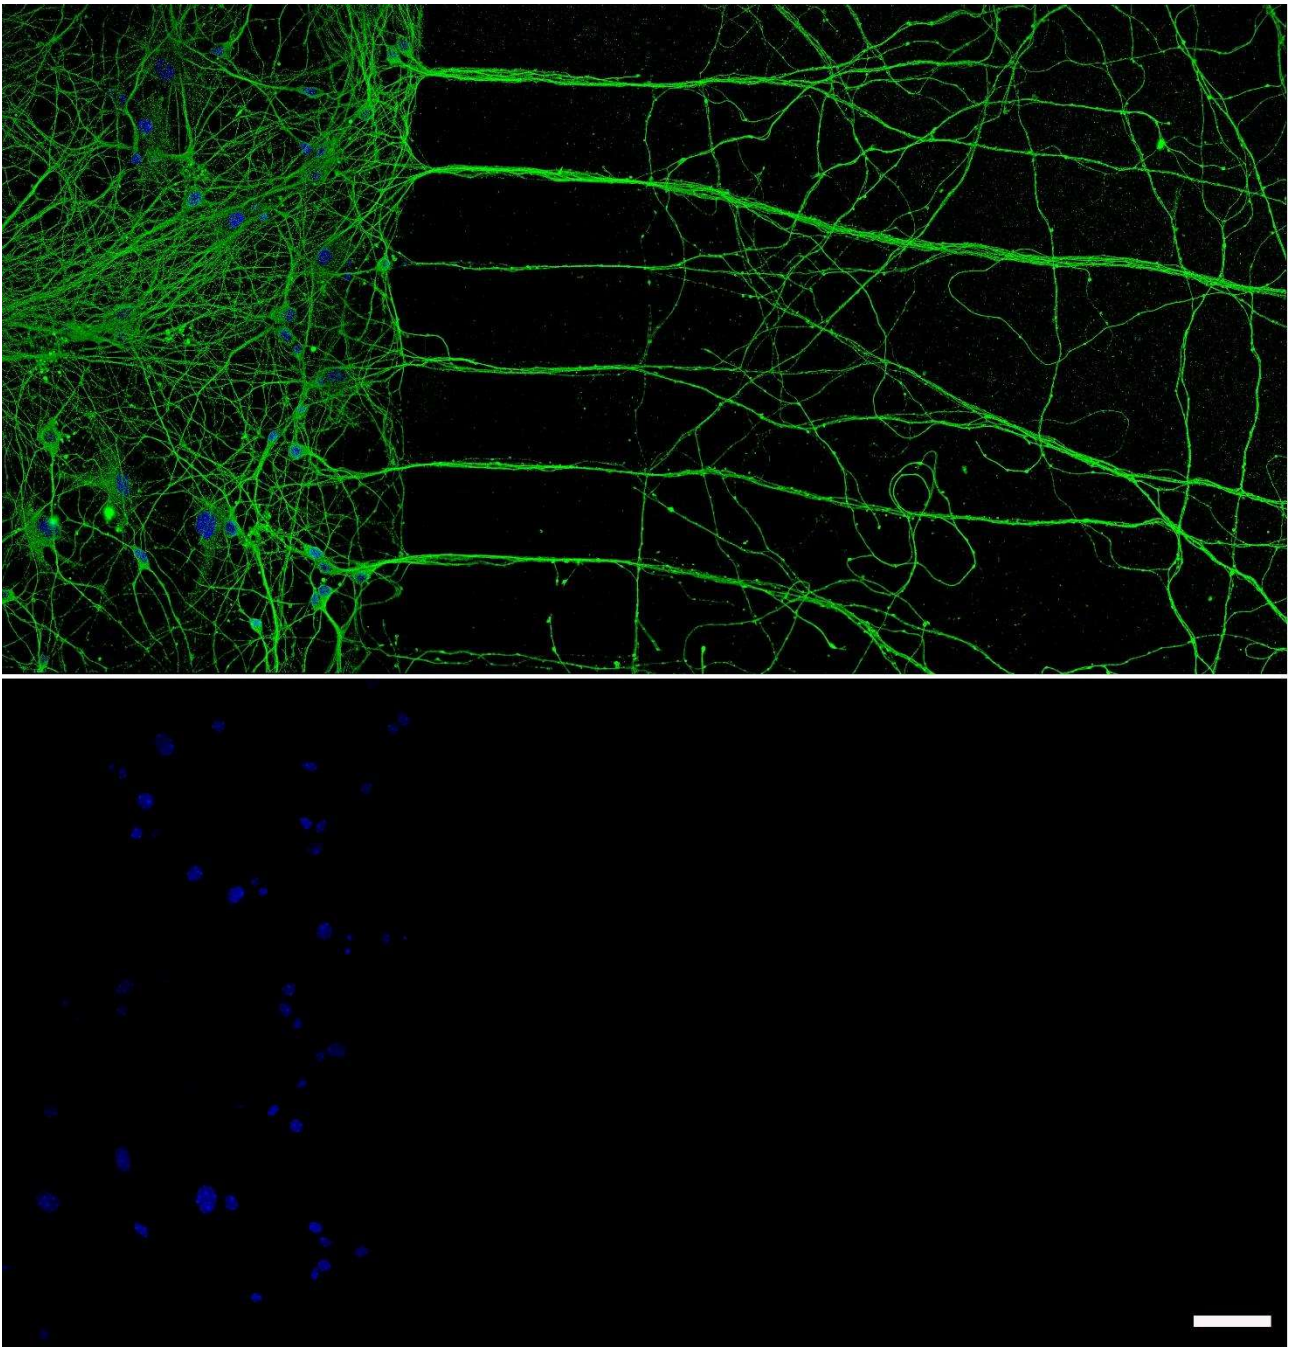

**Figure S1 (related to Figure 1).** Representative image of the somato-dendritic and the axonal compartment. In bottom panel is shown the absence of somata in the axonal compartment as no nuclei were found; BTUBBIII (green), Hoechst (blue) staining; scale bar: 50  $\mu\text{m}$ .

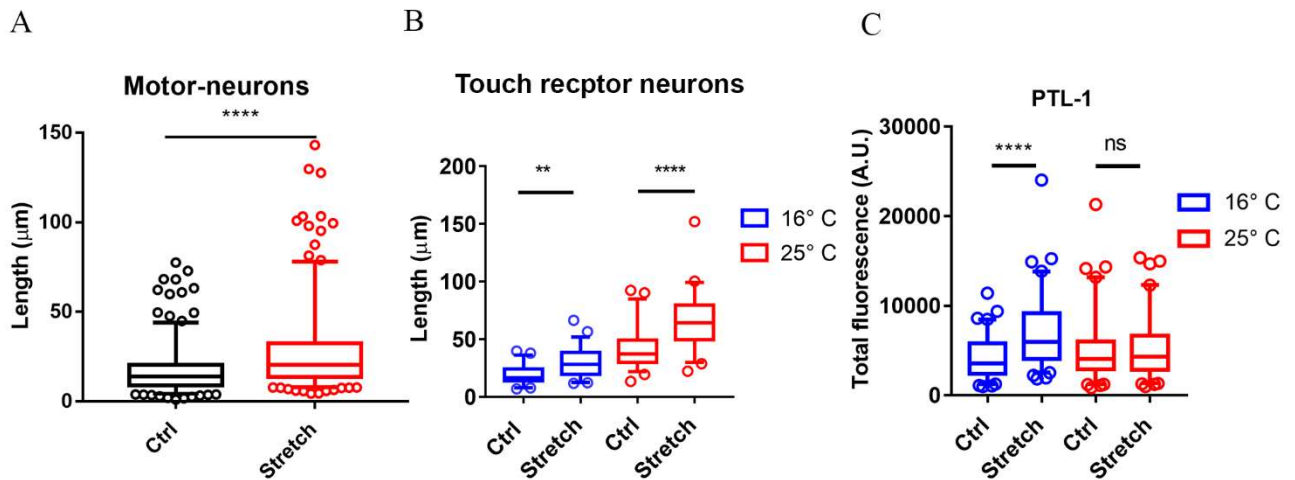

**Figure S2 (related to Figure 2).** (A) Neurite length of motor-neurons in control and stretched conditions (MSB32 strain). Box plot, 5-95 percentile,  $n=250$  from five independent assays. Mann-Whitney test,  $p<0.0001$ . (B) Axonal length of WT touch receptor neurons for  $\alpha$  and  $\beta$ -tubulin (GN692 strain). Control and stretched axons have been measured both, at 16°C and at 25°C. Box plot, 5-95 percentile,  $n=50$  neurites. Kruskal-Wallis test with post hoc Dunn's test,  $p<0.0001$ . (C) Quantification of mNG total fluorescence in a transgenic model of tagged mNG::PTL-1 at 16°C and at 25°C. Box plot (5-95 percentile),  $n=80$  neurites from four biological replicates. Kruskal-Wallis test with post hoc Dunn's test,  $p<0.0001$ .

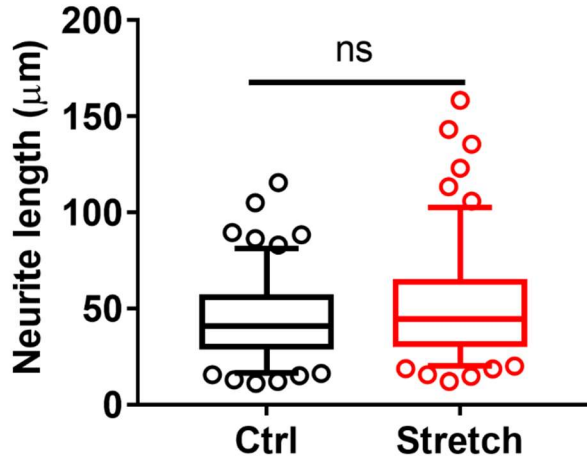

**Figure S3 (related to Figure 4).** Neurite length of touch receptor neurons of a *C. elegans* strain encoding for a fluorescent UNC-104 with Nocodazole treatment ( $1.8 \text{ ng} \cdot \text{ml}^{-1}$ ). Box plot (5-to-95 percentile),  $n=120$  neurites from four biological replicates. Mann Whitney test,  $p=0.08$ .

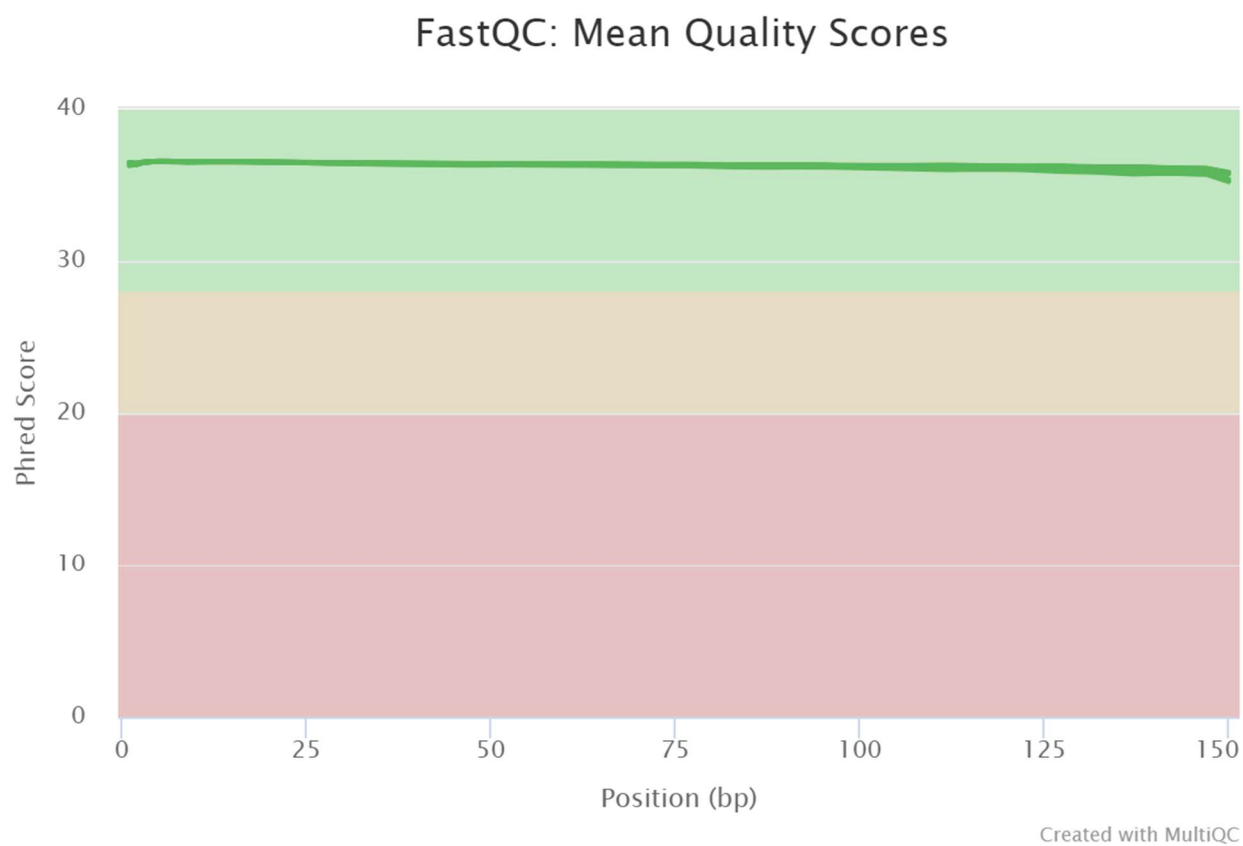

**Figure S4 (related to Figure 1).** Quality control checks on raw sequence datasets.



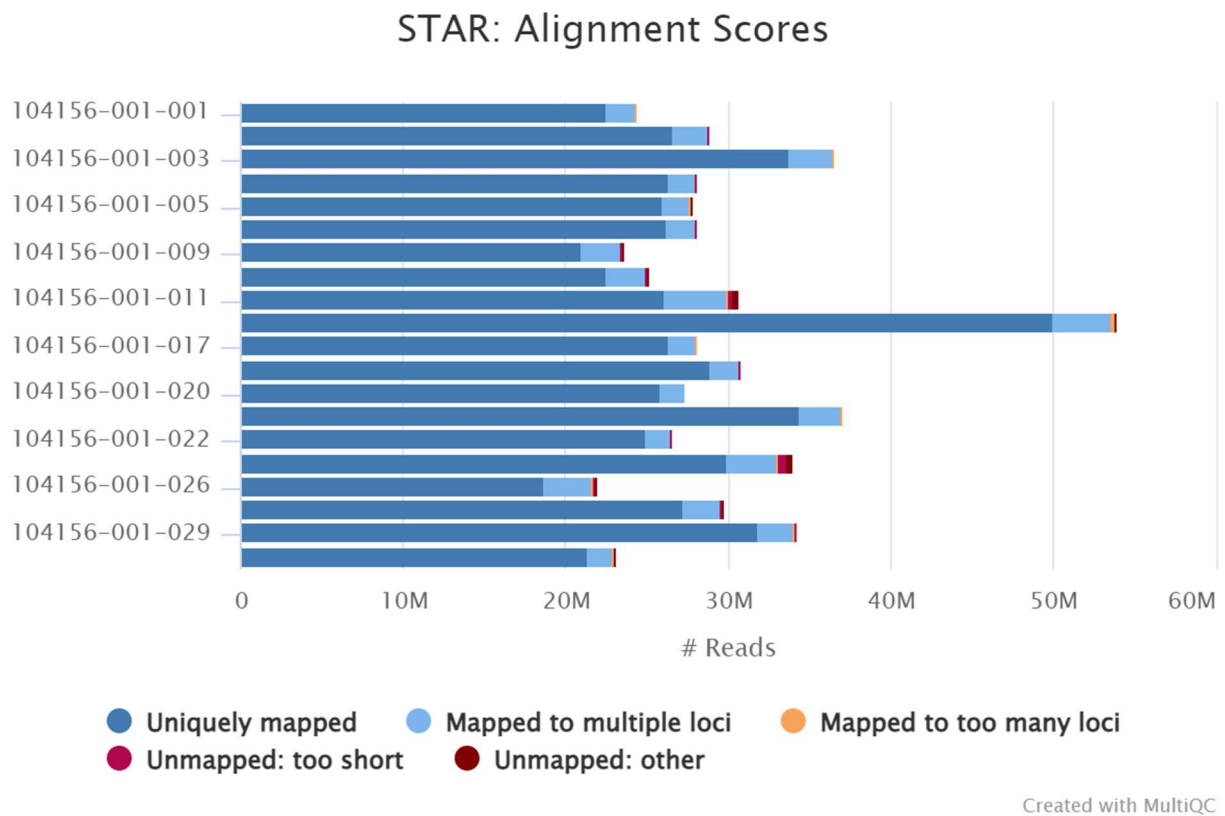

**Figure S5 (related to Figure 1).** Scores of the reads alignment to the reference genome.

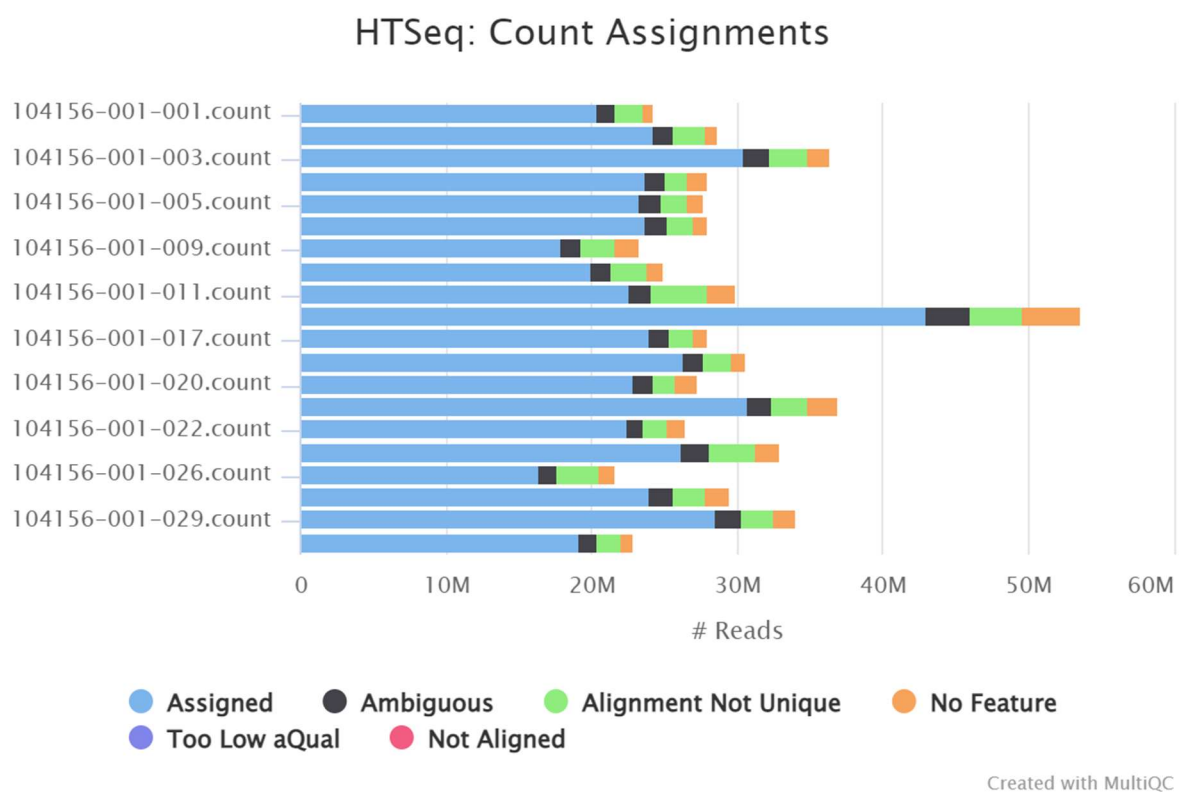

**Figure S6 (related to Figure 1).** Count of the reads mapped against the genes of the reference genome.

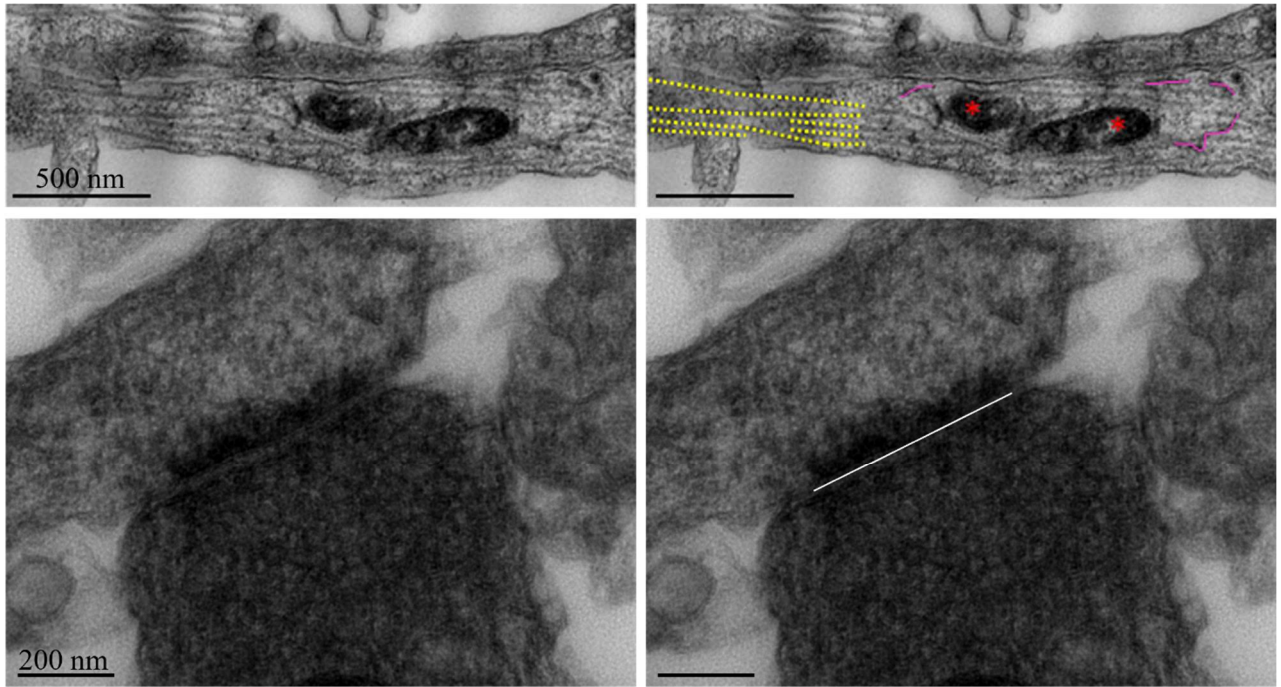

**Figure S7 (related to Figure 2 and 7).** Representative TEM images. MTs: dashed yellow lines; ER: magenta lines; mitochondrion indicated with “\*”; PSD region: white line.
